# Supplementary material for: An in situ dual modification strategy for enhancing the electrocatalytic oxygen evolution performance of ZIF-67
Source: Royal Society of Chemistry journal article supplement (doi:10.1039/d5dt01416f), 2025-01-01
Supplement: d5dt01416f1.pdf [file d5dt01416f1.pdf]

## Supporting Information

### **An *in situ* Dual Modification Strategy for Enhancing the Electrocatalytic Oxygen Evolution Performance of ZIF-67**

*Rajesh Kumar Swain,<sup>a±</sup> Aranya Kar,<sup>a±</sup> Aditi Halder<sup>a</sup> and Chullikkattil P. Pradeep<sup>a\*</sup>*

<sup>a</sup>School of Chemical Sciences, Indian Institute of Technology Mandi, Mandi,  
Himachal Pradesh – 175005, India, Email: [pradeep@iitmandi.ac.in](mailto:pradeep@iitmandi.ac.in); Fax:  
+911905 267 009; Tel: +91 1905 267 045

<sup>±</sup> These authors contributed equally to the manuscript

| Sr.<br>No. | Contents                                                                                                                                     | Page<br>No. |
|------------|----------------------------------------------------------------------------------------------------------------------------------------------|-------------|
| 1.         | Electrochemical Methods                                                                                                                      | S3          |
| 2.         | XRD of simulated and synthesized <b>Z67</b> ; BET parameters of the materials                                                                | S4          |
| 3.         | ICP-MS data                                                                                                                                  | S5          |
| 4.         | C 1s, N 1s, O 1s, and V 2p XPS scans                                                                                                         | S5-S6       |
| 5.         | XPS atomic % table                                                                                                                           | S7          |
| 6.         | TGA data of <b>Z67</b> , <b>25/50/75NZ67</b>                                                                                                 | S8          |
| 7.         | Size-distribution of <b>Z67</b> , <b>25NZ67</b> and <b>50NZ67</b>                                                                            | S8-S9       |
| 8.         | EDX spectra of <b>25/50/75NZ67</b>                                                                                                           | S10-S11     |
| 9.         | FESEM images of <b>Z67</b> , <b>25/50/75NZ67</b>                                                                                             | S11         |
| 10.        | Elemental mapping and corresponding EDX of <b>25/50/75NZ67</b>                                                                               | S12-S14     |
| 11.        | HRTEM images of <b>25/50/75NZ67</b> , V <sub>10</sub> POM; TEM images of <b>Z67</b> , <b>25/50/75NZ67</b>                                    | S15         |
| 12.        | SAED patterns of <b>NiV<sub>10</sub></b> , <b>25NZ67</b> , <b>50NZ67</b> and <b>75NZ67</b>                                                   | S16         |
| 13.        | CV comparison of <b>Z67</b> and <b>25/50/75NZ67</b>                                                                                          | S16         |
| 14.        | DPV comparison of <b>Z67</b> , <b>NiV<sub>10</sub></b> and <b>25/50/75NZ67</b> ; Area under the curve from LSV scans of the three composites | S17         |
| 15.        | Characterization of control samples (XRD, FT-IR, XPS)                                                                                        | S18-S21     |
| 16.        | C <sub>dl</sub> calculation and j <sub>ECSA</sub> of <b>25/50/75NZ67</b>                                                                     | S22-S23     |
| 17.        | Tafel plots and EIS circuit fitting parameters of <b>25/50/75NZ67</b>                                                                        | S23-S24     |
| 18.        | iR-corrected LSV scans and comparison with non-corrected                                                                                     | S24-25      |
| 19.        | Chronoamperometry of <b>25/50/75NZ67</b> , and UV-vis spectra of recovered electrolyte after chronoamperometry                               | S25-S26     |
| 20.        | Co 2p and V 2p scans of recovered <b>25NZ67</b> after chronoamperometry                                                                      | S27         |
| 21.        | Deconvoluted Ni 2p XPS of <b>25NZ67</b> after 8h chronoamperometry                                                                           | S28         |
| 18.        | FESEM images of recovered <b>25NZ67</b>                                                                                                      | S29         |
| 19.        | Comparison table of similar catalysts reported for electrocatalytic OER                                                                      | S29         |
| 20.        | References                                                                                                                                   | S30         |

## Electrochemical Methods

### Fabrication of working electrodes.

The sample-modified electrodes were prepared as follows: 4 mg of the catalyst, 1 mg of acetylene black, and 10  $\mu\text{L}$  of 5 wt% Nafion (aq) binder were taken in 1 mL of isopropyl alcohol (IPA)/water mixture (3:2; v/v) and sonicated until a homogeneous suspension was formed. 20  $\mu\text{L}$  of this mixture was drop-casted on the 4 mm glassy carbon electrode (GCE) (geometrical area = 0.126  $\text{cm}^2$ ), resulting in a constant catalyst coating of 80  $\mu\text{g}$  in all samples on the electrode surface. GCE coated with the catalyst mixture was dried under the IR lamp (temperature  $\sim 70^\circ\text{C}$ ). All the electrochemical experiments were performed at ambient temperature.

### Electrochemical data analyses.

The electrocatalytic OER experiments were conducted on an electrochemical work station (CHI 760F, made in U.S.A). The working electrodes were scanned several times until the signals were stabilized, and then LSV data were collected. CV and LSV analyses were performed to confirm the electrocatalytic properties of the working electrodes.

Butler-Volmer equation was used to estimate the OER slope considering the exponential region of the obtained LSV curves. By employing the Tafel equation:

$$\eta = b \log j + a$$

Where  $\eta$  is the overpotential,  $b$  is the Tafel slope,  $j$  is the current density and  $a$  is the exchange current density. The Tafel slopes and exchange current densities could be calculated for composites.

In addition, the overpotential was calculated using:

$$\eta = E(\text{RHE}) - 1.23 \text{ V}$$

The electrochemically active surface area (ECSA) of the catalyst was calculated by the following equation:

$$\text{ECSA} = C_{\text{dl}} / C_s$$

where  $C_{\text{dl}}$  is the electrochemical double-layer capacitance calculated from cyclic voltammetry in a non-Faradaic region under variable scan rates.  $C_s$  is the specific capacitance. We used the reported value of 0.040  $\text{mF cm}^{-2}$  for **Z67**-based system.<sup>1</sup>

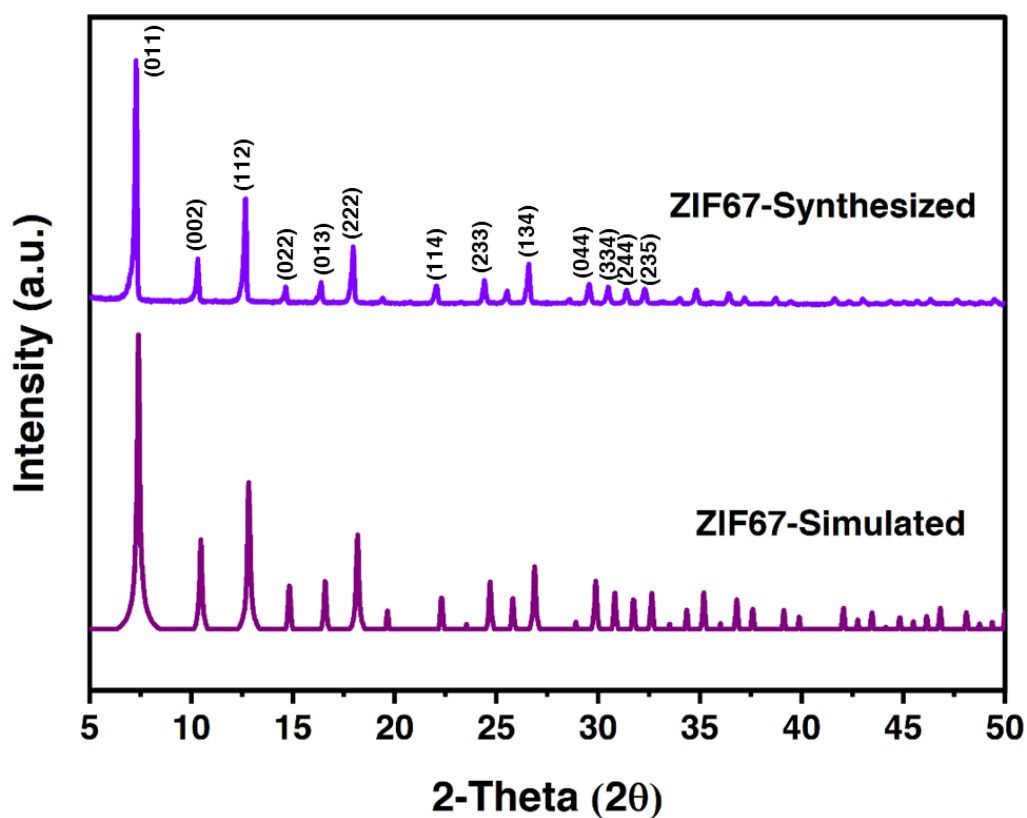

Fig. S1 XRD patterns of simulated **Z67** and synthesized **Z67**.

Table S1. BET parameters of pristine **Z67** and all three composites (**25/50/75NZ67**).

| Material      | Surface Area (m <sup>2</sup> /g) | Avg. Pore diameter (nm) | Pore volume (cm <sup>3</sup> /g) |
|---------------|----------------------------------|-------------------------|----------------------------------|
| <b>Z67</b>    | 1102.99                          | 2.38                    | 0.656                            |
| <b>25NZ67</b> | 764.97                           | 2.62                    | 0.5                              |
| <b>50NZ67</b> | 483.54                           | 2.76                    | 0.367                            |
| <b>75NZ67</b> | 356.10                           | 3.02                    | 0.268                            |

Table S2. ICP-MS data for **Z67**, **25NZ67**, **50NZ67** and **75NZ67**.

| Sample        | Co (mmol g <sup>-1</sup> ) | V (mmol g <sup>-1</sup> ) | Ni (mmol g <sup>-1</sup> ) | Ni/Co  | V/Co  | Ni/V  |
|---------------|----------------------------|---------------------------|----------------------------|--------|-------|-------|
| <b>Z67</b>    | 4.77                       | —                         | —                          | —      | —     | —     |
| <b>25NZ67</b> | 5.19                       | 0.84                      | 0.007                      | 0.0013 | 0.162 | 0.008 |
| <b>50NZ67</b> | 5.21                       | 1.58                      | 0.022                      | 0.004  | 0.303 | 0.014 |
| <b>75NZ67</b> | 5.12                       | 1.94                      | 0.034                      | 0.007  | 0.38  | 0.017 |

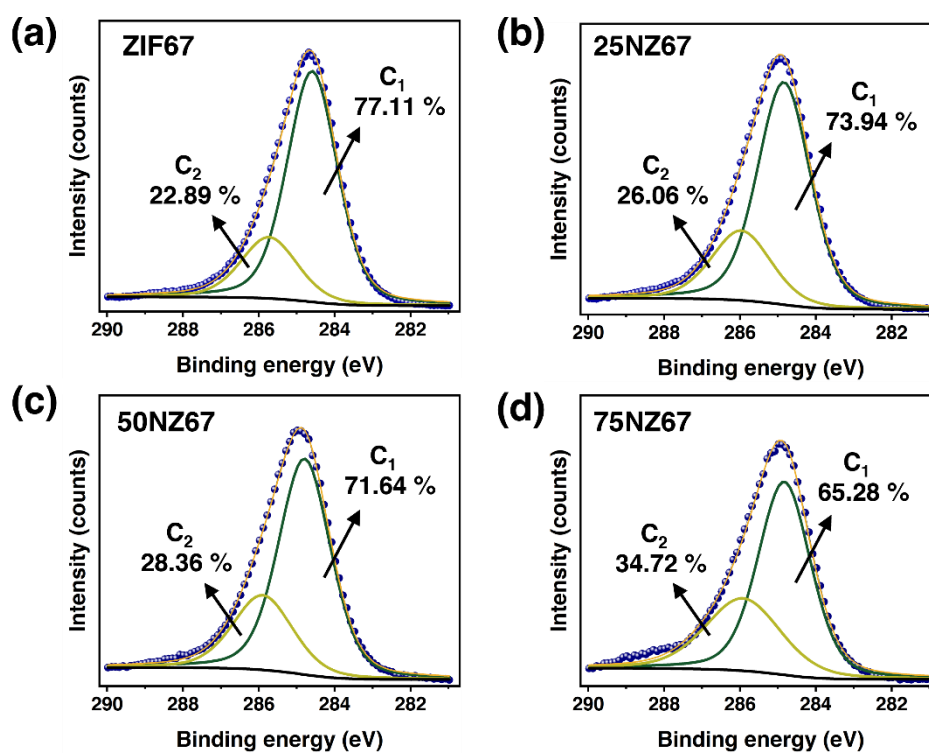

Fig. S2 C 1s XPS spectra of (a) **Z67**; (b) **25NZ67**; (c) **50NZ67** and (d) **75NZ67**.

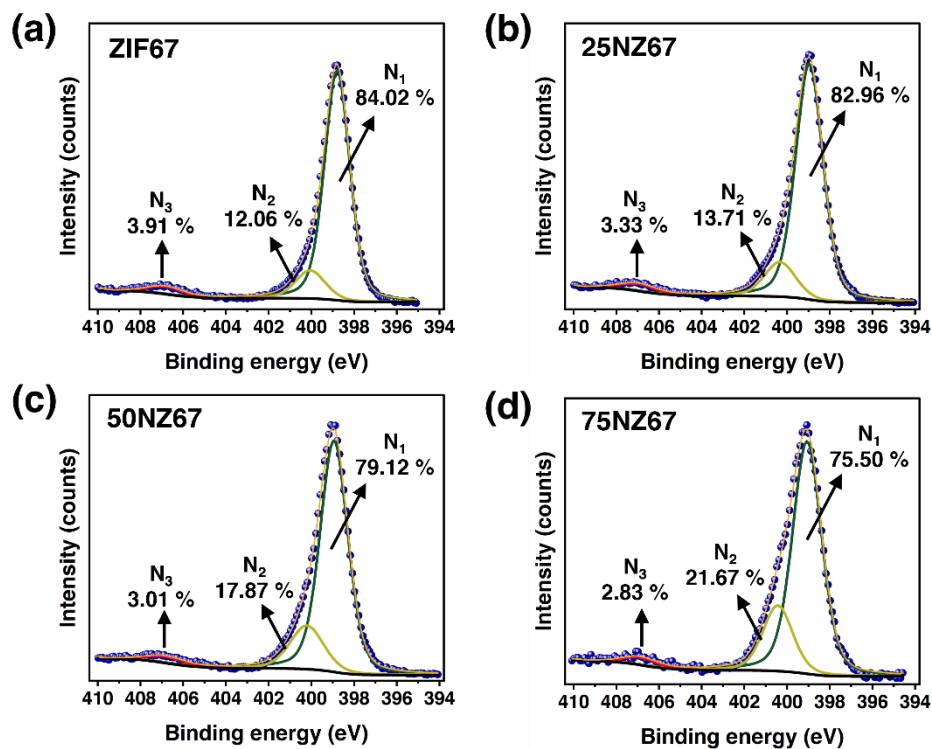

Fig. S3 N 1s XPS spectra of (a) Z67; (b) 25NZ67; (c) 50NZ67 and (d) 75NZ67.

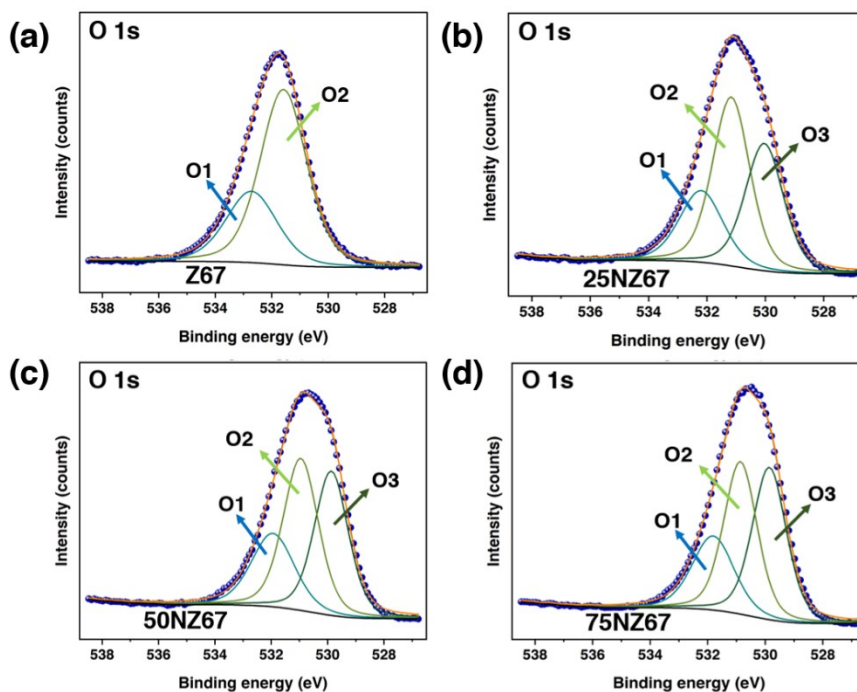

Fig. S4 O 1s XPS spectra of (a) Z67; (b) 25NZ67; (c) 50NZ67 and (d) 75NZ67.

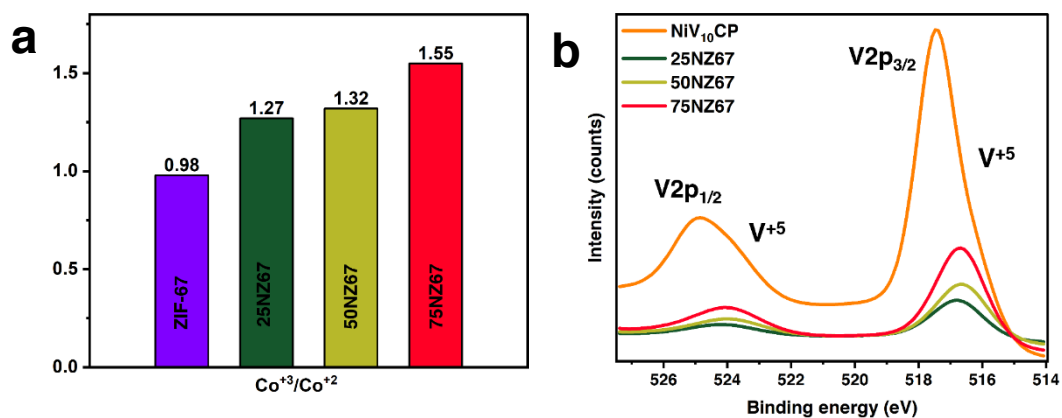

**Fig. S5** (a)  $\text{Co}^{3+}/\text{Co}^{2+}$  ratio calculated from XPS analysis for **Z67** and **25/50/75NZ67** composites; and (b) Stacking of XPS high-resolution V 2p core-level peaks for **NiV<sub>10</sub>** and all three composites (**25/50/75NZ67**).

**Table S3.** XPS atomic % data for **Z67**, **25NZ67**, **50NZ67** and **75NZ67**.

| Sample               | XPS atomic % (at.%) |       |       |       |       |      |      | Ni/V ratio |
|----------------------|---------------------|-------|-------|-------|-------|------|------|------------|
|                      | C                   | O     | N     | Co    | V     | Ni   | K    |            |
| NiV <sub>10</sub> CP | 16.84               | 53.50 | -     | -     | 16.59 | 6.08 | 3.17 | 0.36       |
| Zif-67               | 61.90               | 14.82 | 15.48 | 7.80  | -     | -    | -    | -          |
| 25NZ67               | 46.44               | 21.87 | 15.38 | 13.82 | 1.82  | 0.43 | 0.24 | 0.23       |
| 50NZ67               | 41.64               | 26.28 | 13.59 | 14.79 | 2.92  | 0.52 | 0.26 | 0.17       |
| 75NZ67               | 31.94               | 37.72 | 7.39  | 17.50 | 4.63  | 0.59 | 0.23 | 0.12       |

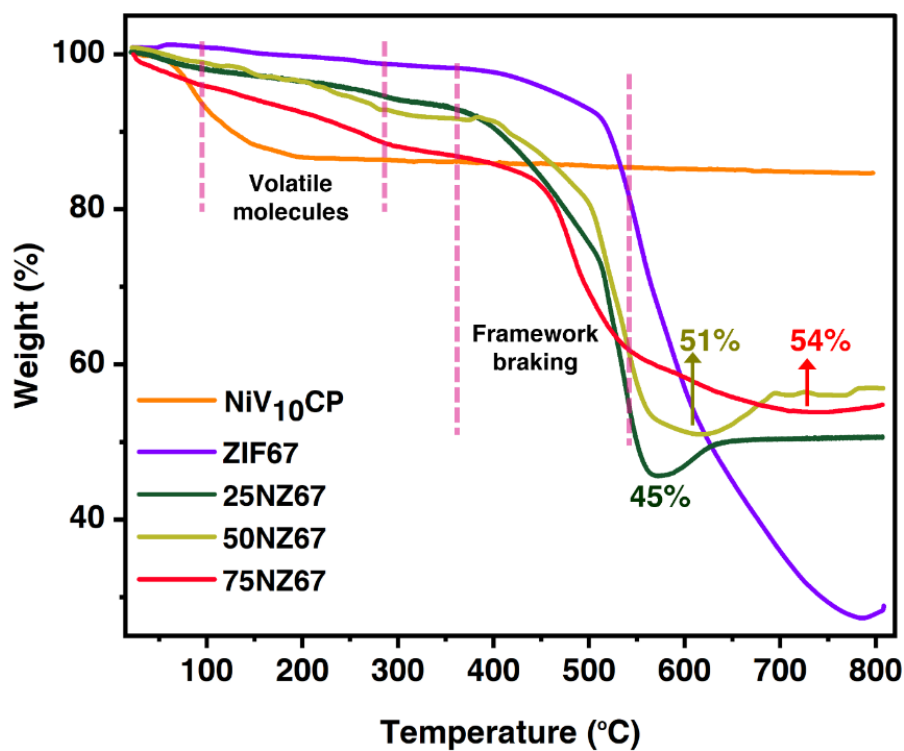

**Fig. S6** Thermogravimetric analysis of Z67, NiV<sub>10</sub>, 25NZ67, 50NZ67 and 75NZ67.

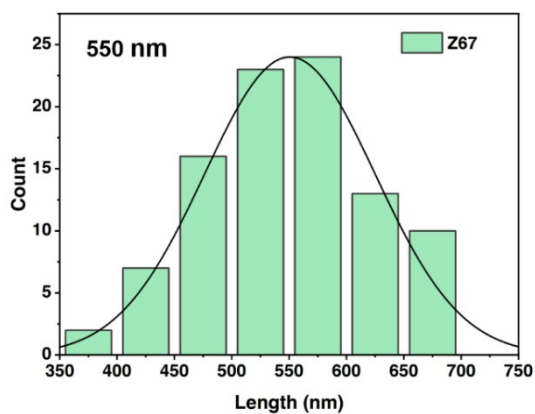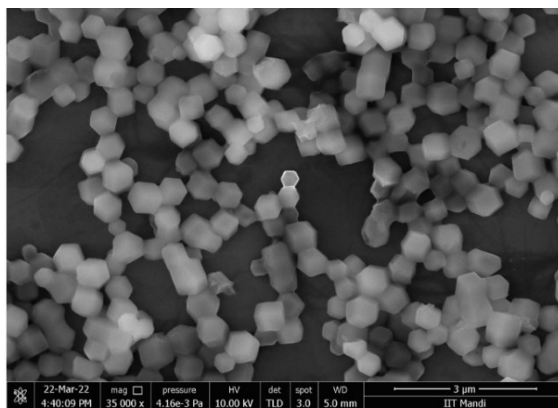

**Fig. S7** Size distribution of Z67 particles calculated using ImageJ software and the corresponding FESEM image used for calculation.



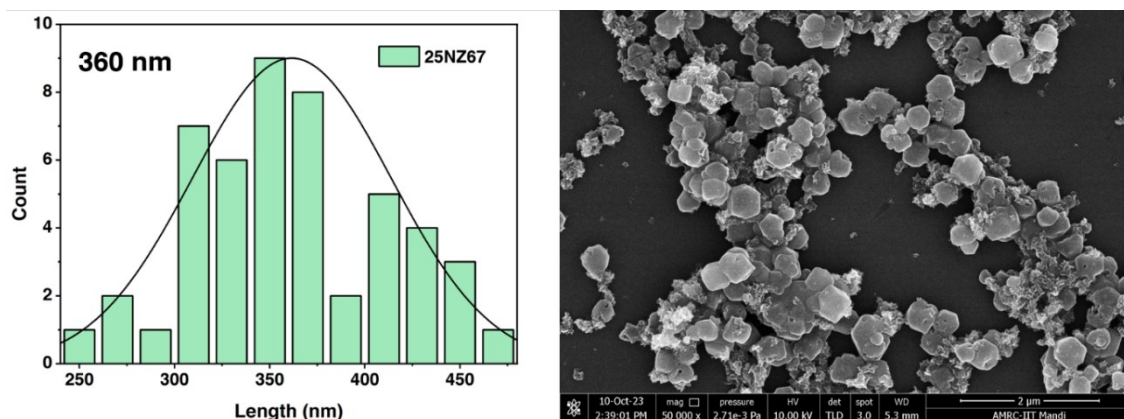

**Fig. S8** Size distribution of **25NZ67** particles calculated using ImageJ software and the corresponding FESEM image used for calculation.

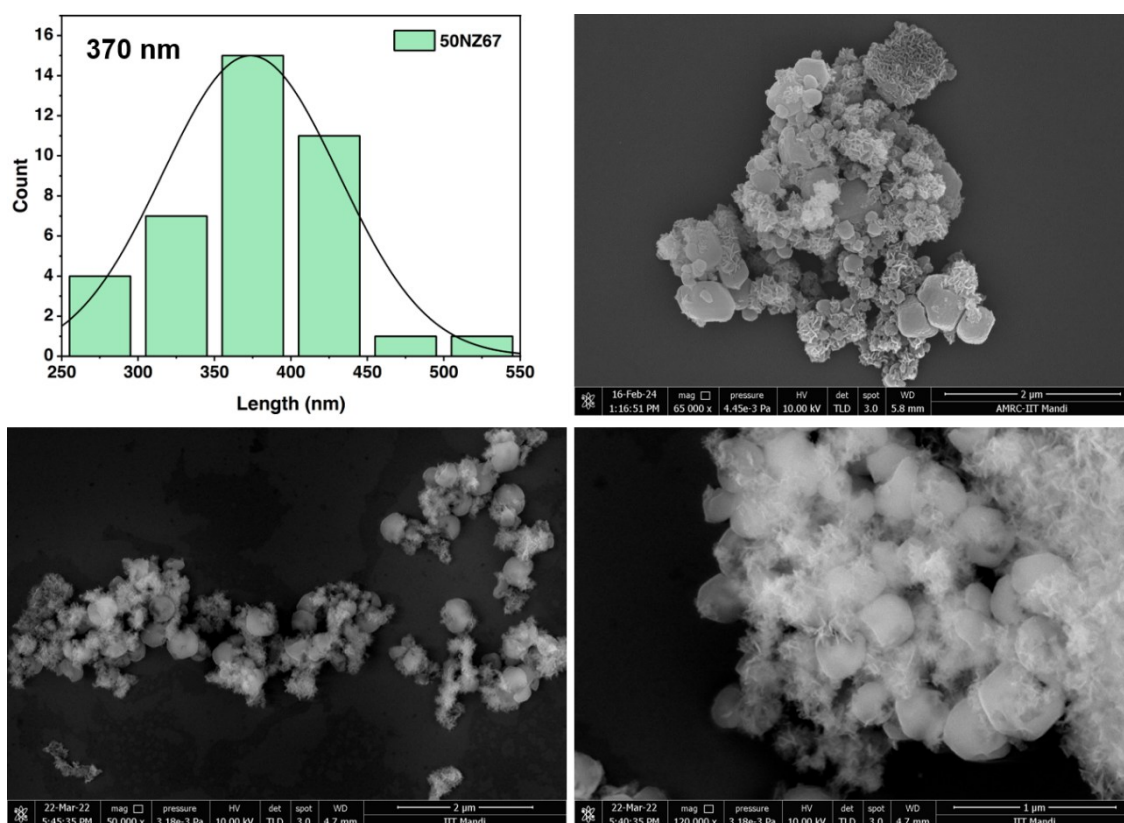

**Fig. S9** Size distribution of **50NZ67** particles calculated using ImageJ software and the corresponding FESEM images used for calculation.

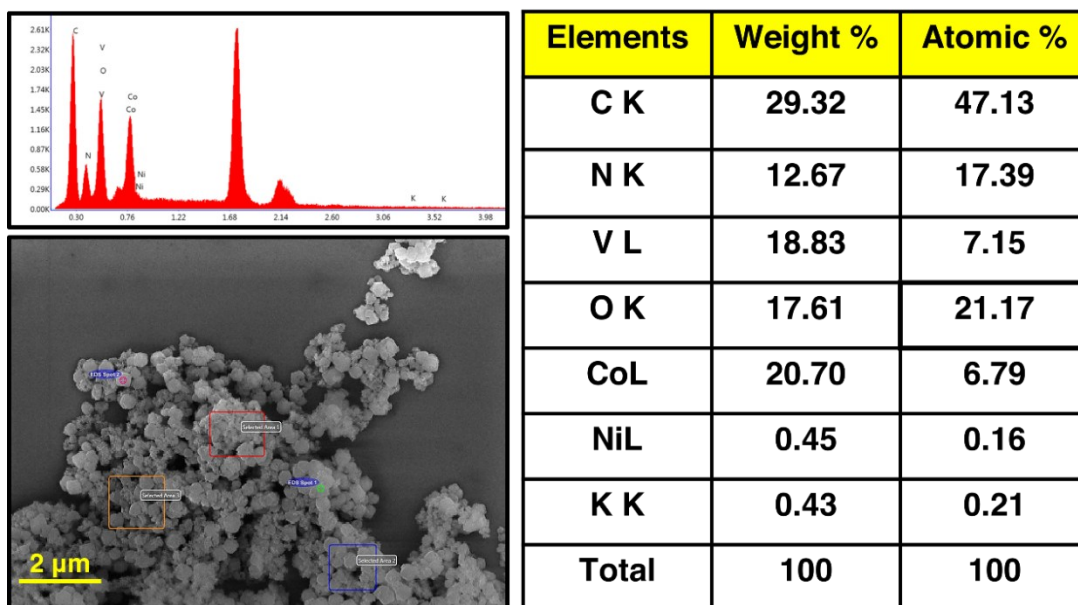

**Fig. S10** EDX spectra of **25NZ67** composite.

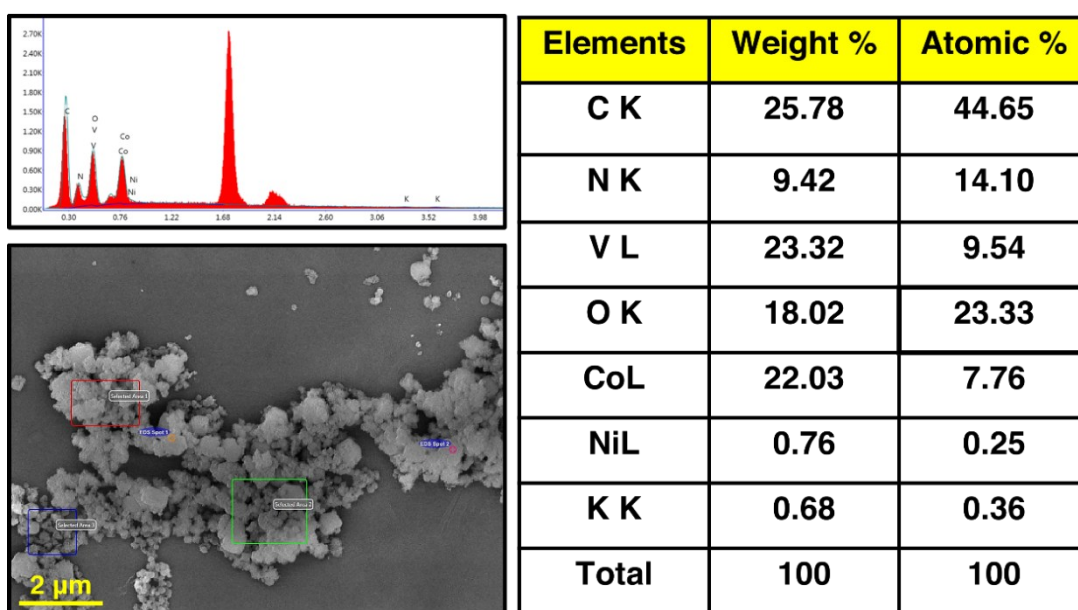

**Fig. S11** EDX spectra of **50NZ67** composite.

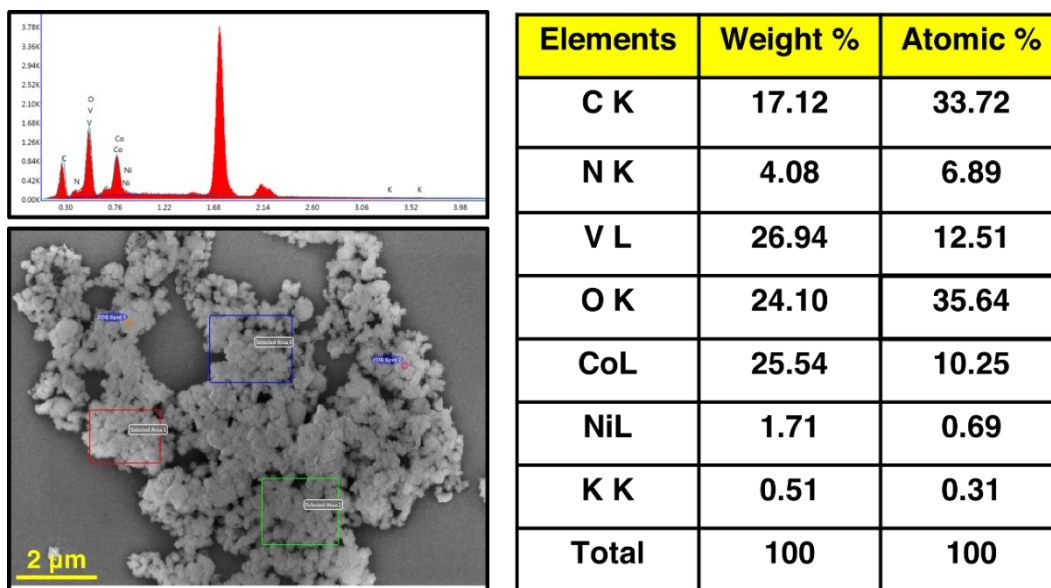

Fig. S12 EDX spectra of 75NZ67 composite.

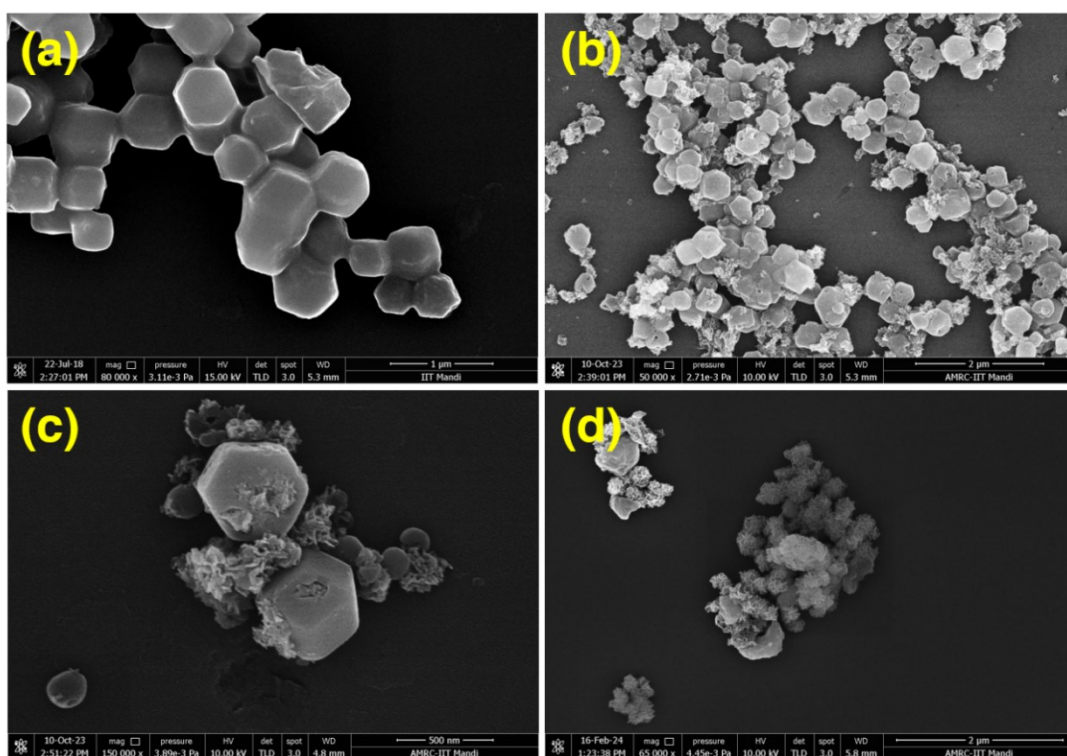

Fig. S13 FESEM images of (a) Z67; (b) 25NZ67; (c) 50NZ67 and (d) 75NZ67.



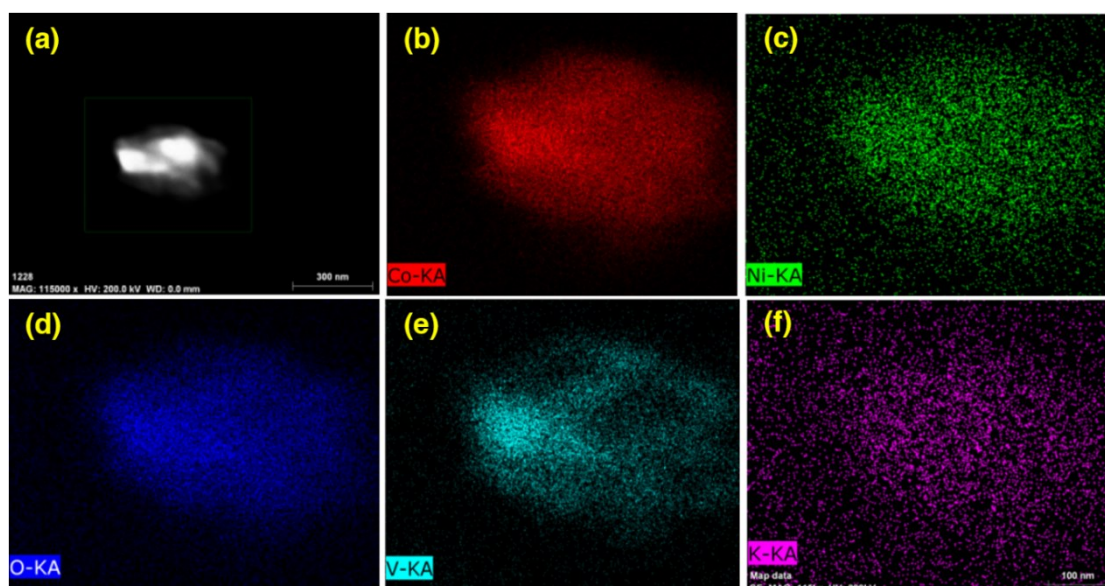

**Fig. S14** Elemental mapping of **25NZ67** showing (a) mapping area; (b) Co map; (c) Ni map; (d) O map; (e) V map; and (f) K map.

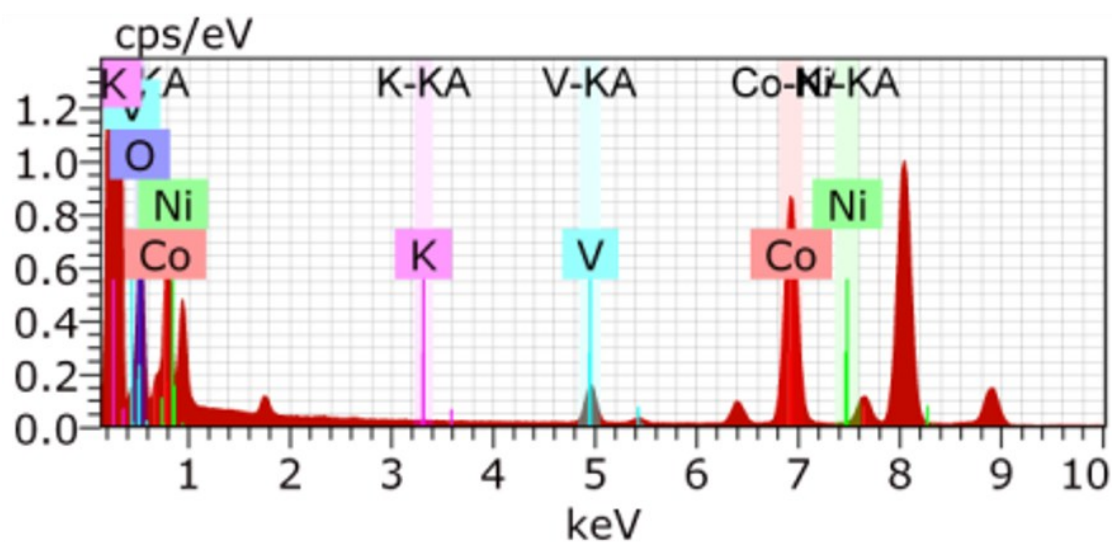

**Fig. S15** EDX of the mapping area of S14 (a).

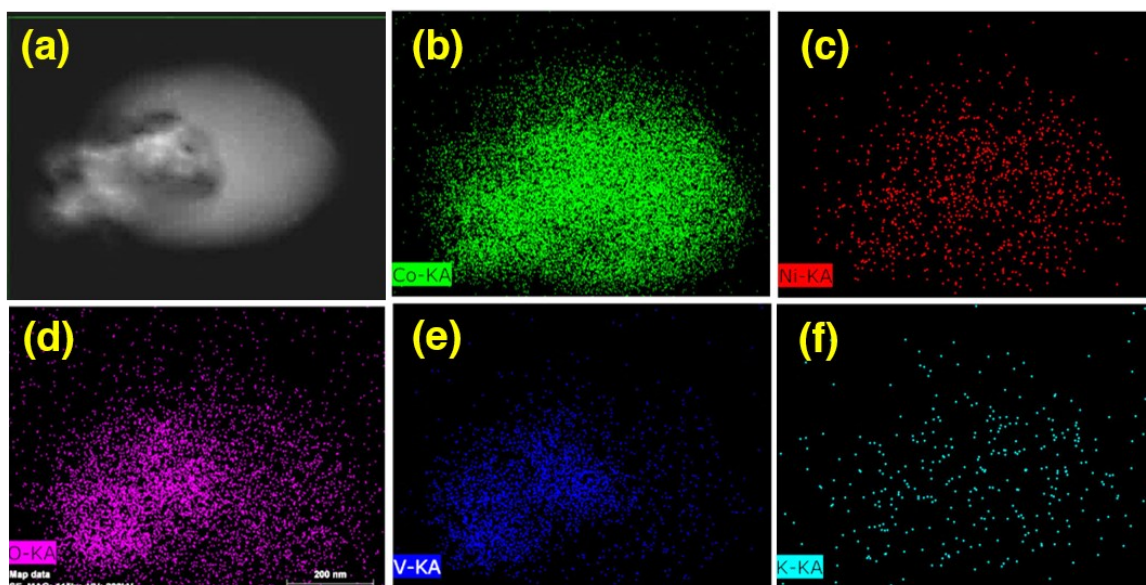

**Fig. S16** Elemental mapping of 50NZ67 showing (a) mapping area; (b) Co map; (c) Ni map; (d) O map; (e) V map and (f) K map.

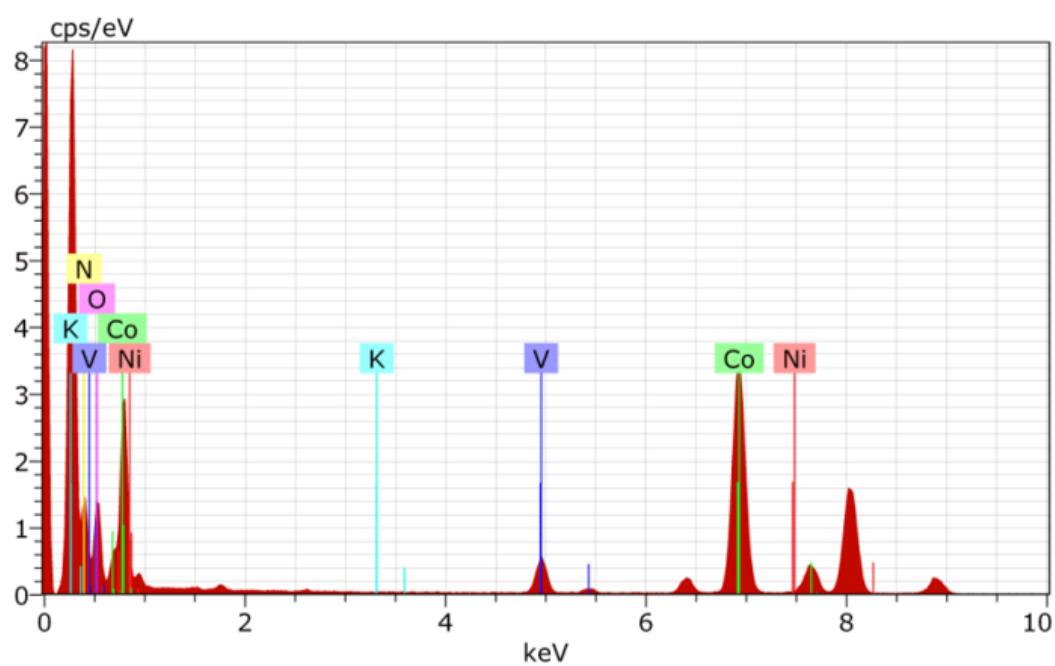

**Fig. S17** EDX of the mapping area of S16 (a).

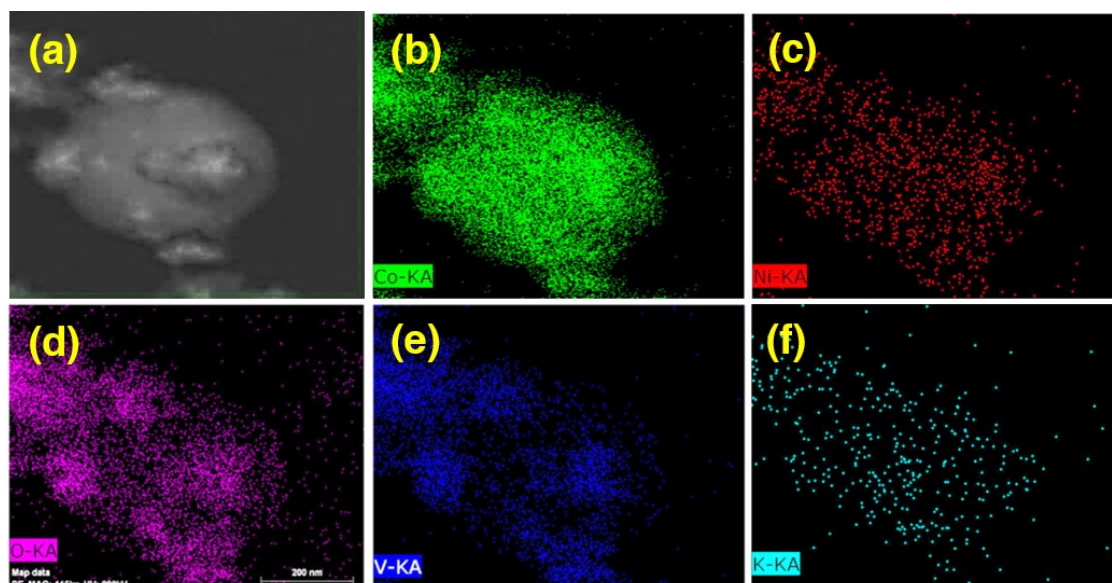

**Fig. S18** Elemental mapping of **75NZ67** showing (a) mapping area; (b) Co map; (c) Ni map; (d) O map; (e) V map and (f) K map.

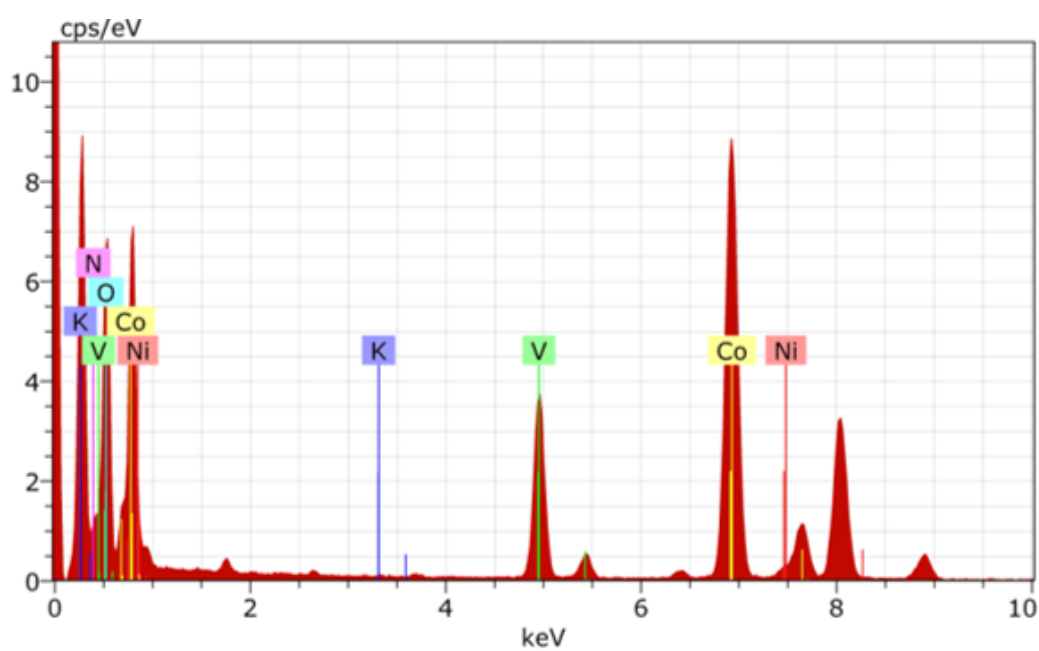

**Fig. S19** EDX of the mapping area of S18 (a).



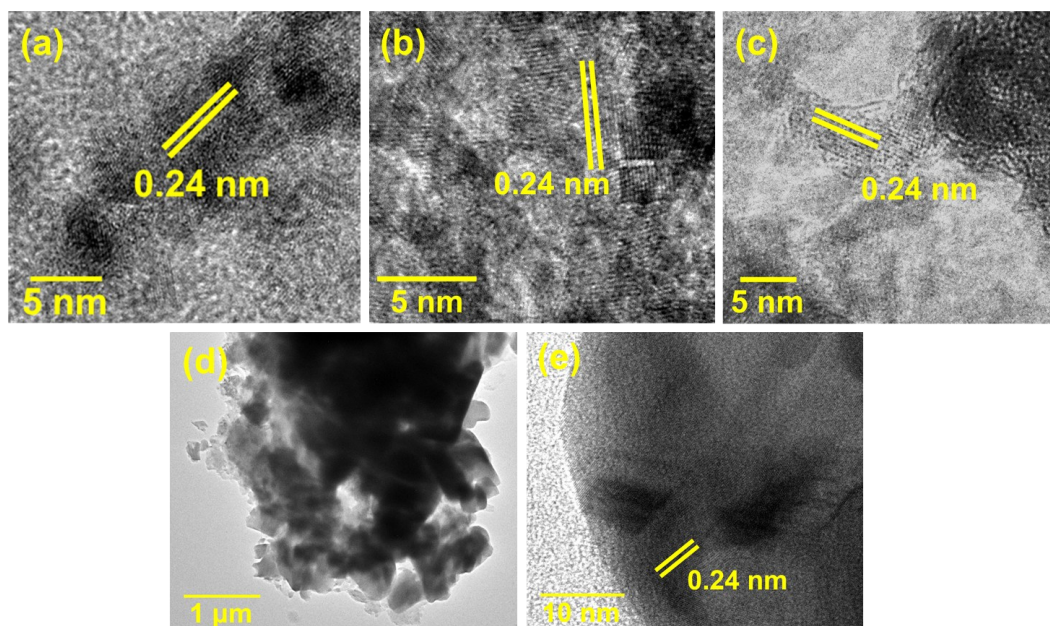

**Fig. S20** HRTEM of (a) **25NZ67**; (b) **50NZ67** and (c) **75NZ67** showing d-spacing of 0.24 nm; (d) TEM image of sodium salt of V<sub>10</sub>POM, and (e) HRTEM of sodium salt of V<sub>10</sub>POM showing d-spacing of 0.24 nm.

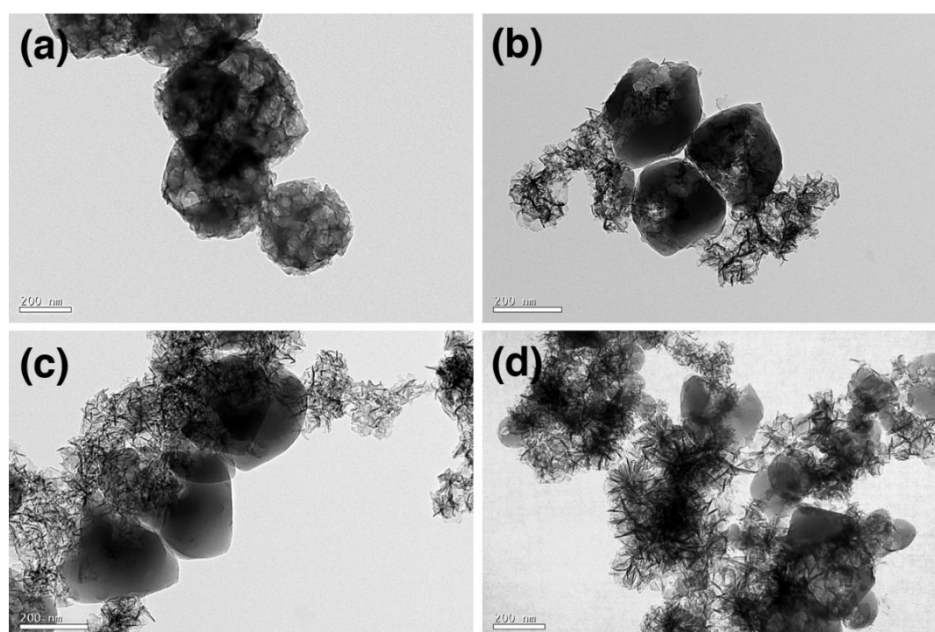

**Fig. S21** TEM images of (a) **Z67**; (b) **25NZ67**; (c) **50NZ67** and (d) **75NZ67**.

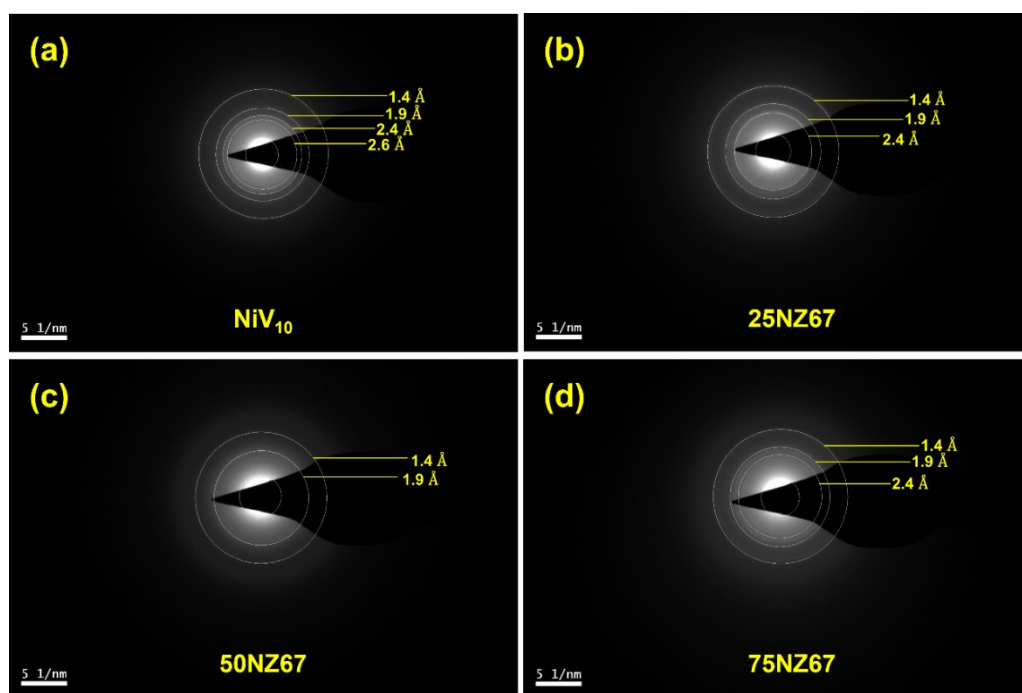

**Fig. S22** SAED patterns of (a)  $\text{NiV}_{10}$  (d-spacing of 2.6, 2.4, 1.9 and 1.4 Å); (b) **25NZ67** (d-spacing of 2.4, 1.9 and 1.4 Å); (c) **50NZ67** (d-spacing of 1.9 and 1.4 Å) and (d) **75NZ67** (d-spacing of 2.4, 1.9 and 1.4 Å).

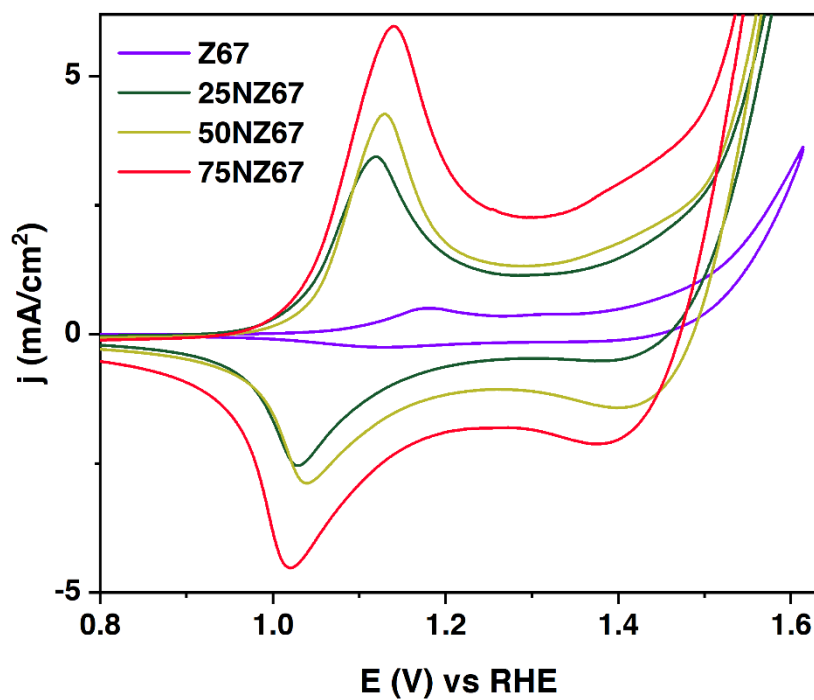

**Fig. S23** Cyclic voltammograms (CVs) of all three composites (**25/50/75NZ67**), and **Z67** in 0.1M KOH.



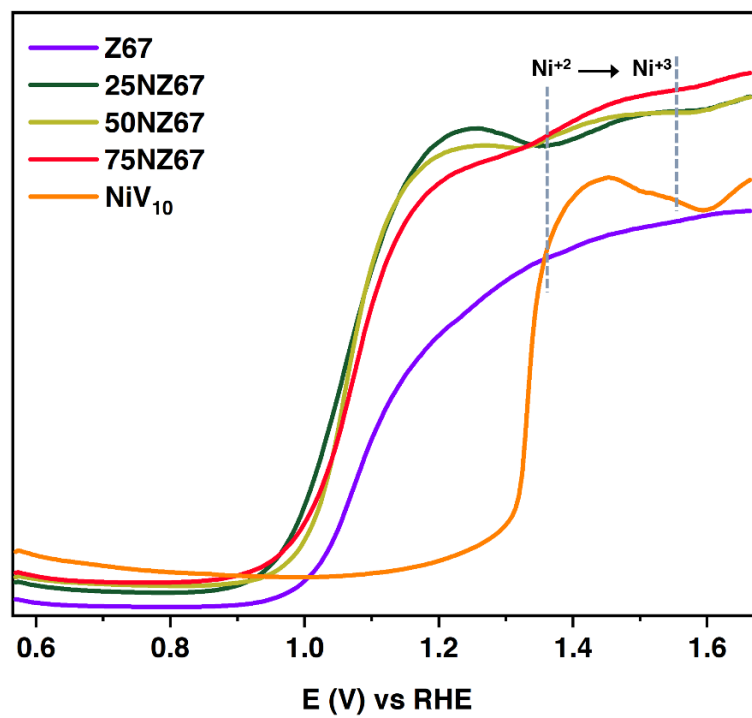

**Fig. S24** Differential pulse voltammograms (DPVs) of three composites (25/50/75NZ67), Z67 and NiV<sub>10</sub> in 0.1M KOH.

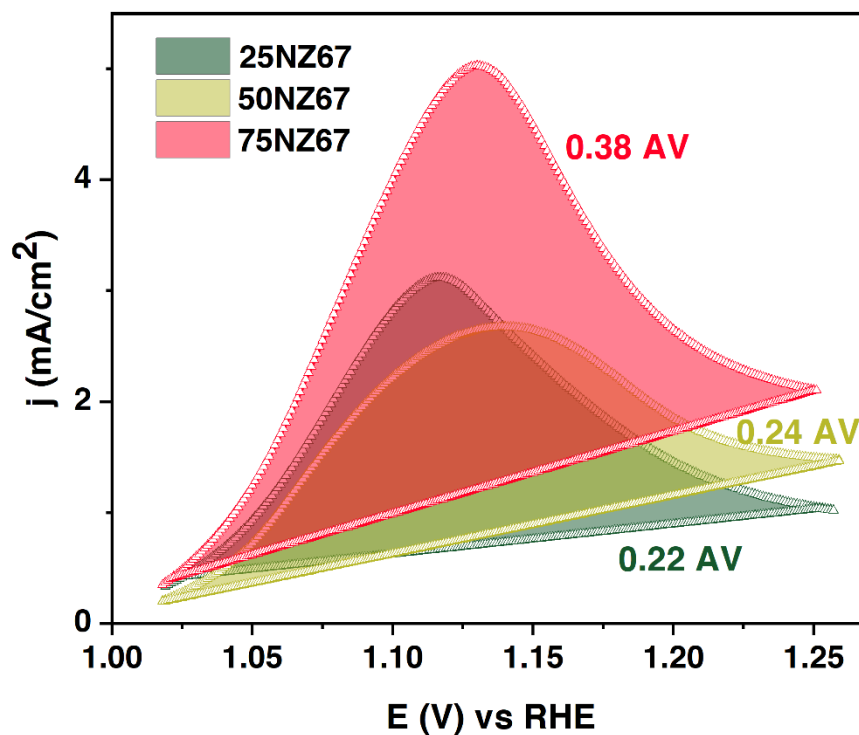

**Fig. S25** Area under the curves for relative quantification of the active species in the three composites, 25/50/75NZ67.

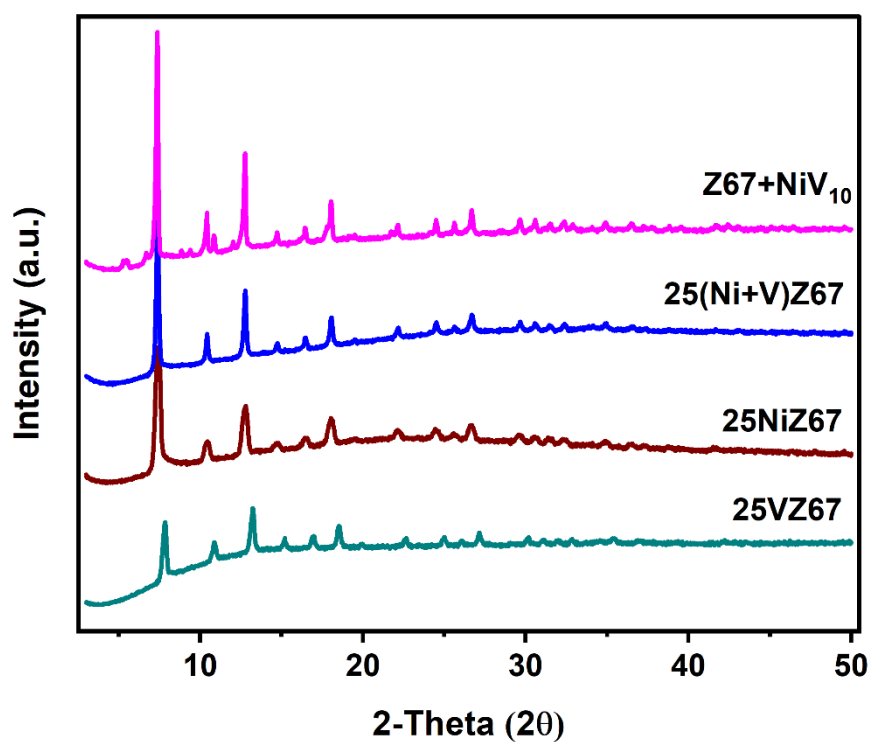

Fig. S26 XRD patterns of 25VZ67, 25NiZ67, 25(Ni+V)Z67 and Z67+NiV<sub>10</sub>.

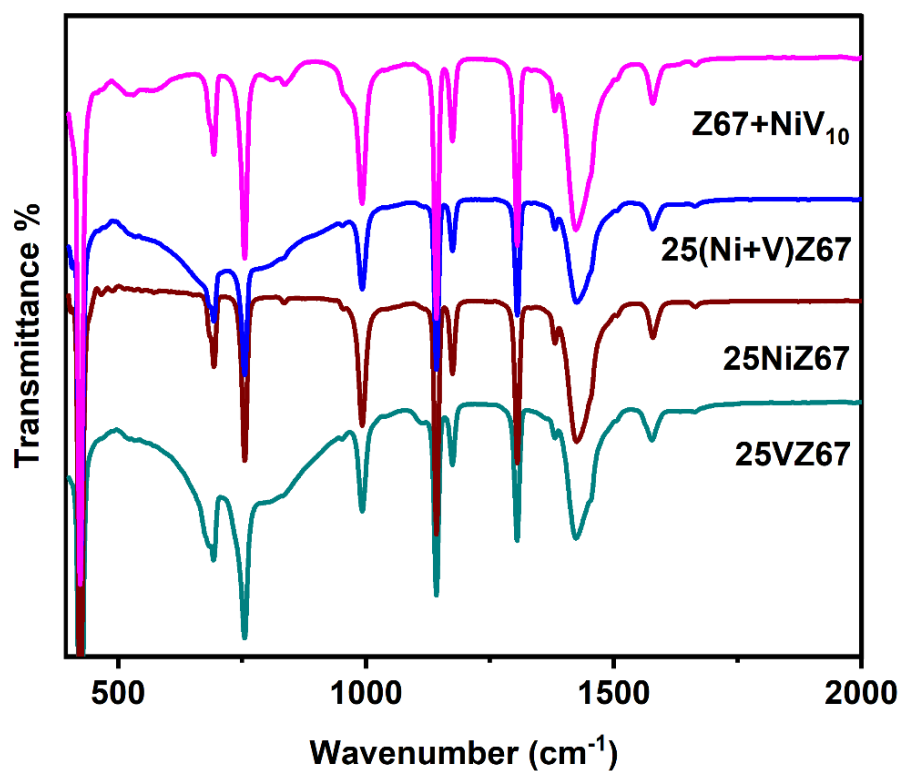

Fig. S27 FT-IR spectra of 25VZ67, 25NiZ67, 25(Ni+V)Z67 and Z67+NiV<sub>10</sub>.

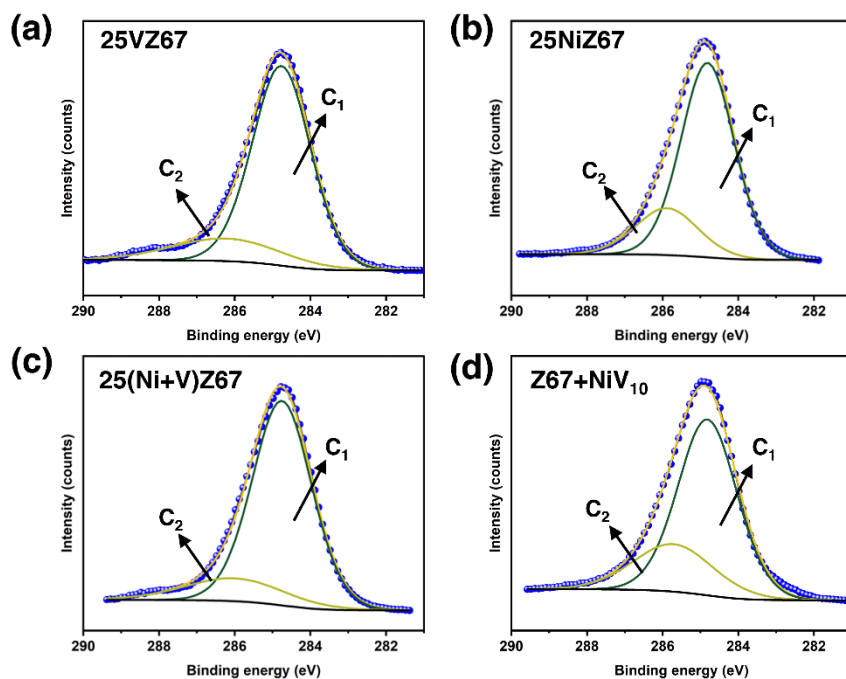

**Fig. S28** C 1s XPS spectra of (a) 25VZ67; (b) 25NiZ67; (c) 25(Ni+V)Z67 and (d) Z67+NiV<sub>10</sub>.

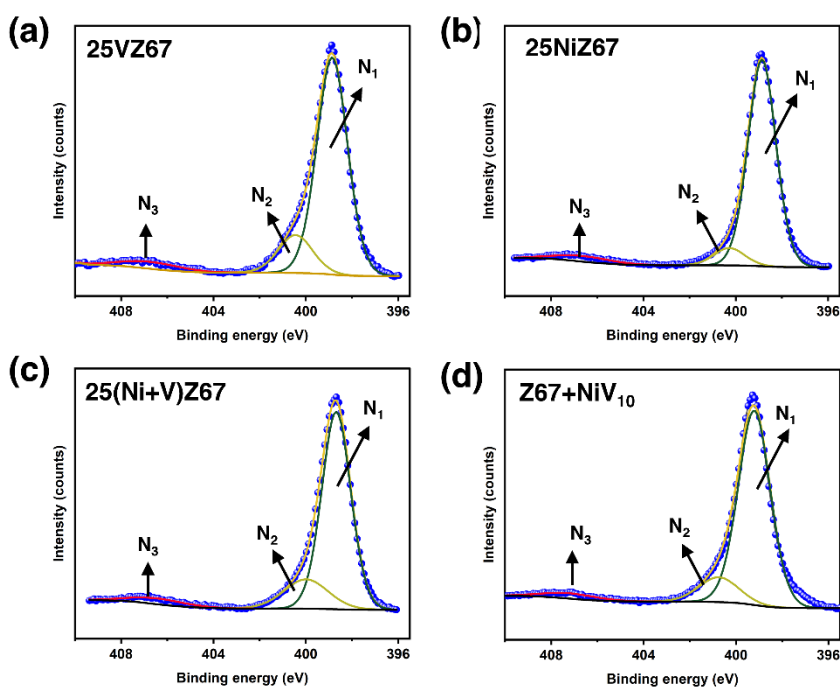

**Fig. S29** N 1s XPS spectra of (a) 25VZ67; (b) 25NiZ67; (c) 25(Ni+V)Z67 and (d) Z67+NiV<sub>10</sub>.

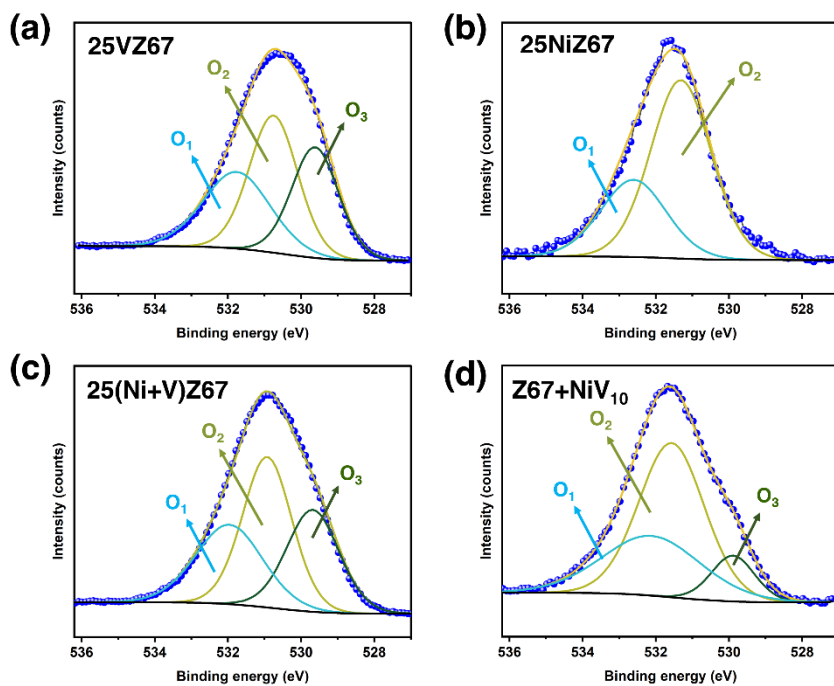

**Fig. S30** O 1s XPS spectra of (a) 25VZ67; (b) 25NiZ67; (c) 25(Ni+V)Z67 and (d) Z67+NiV<sub>10</sub>.

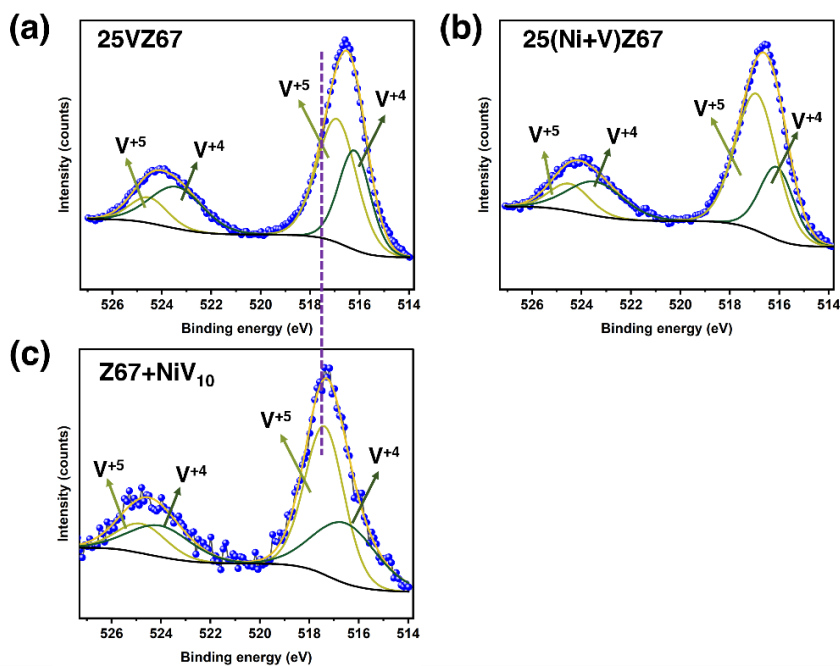

**Fig. S31** V 2p XPS spectra of (a) 25VZ67; (b) 25(Ni+V)Z67; and (c) Z67+NiV<sub>10</sub>.

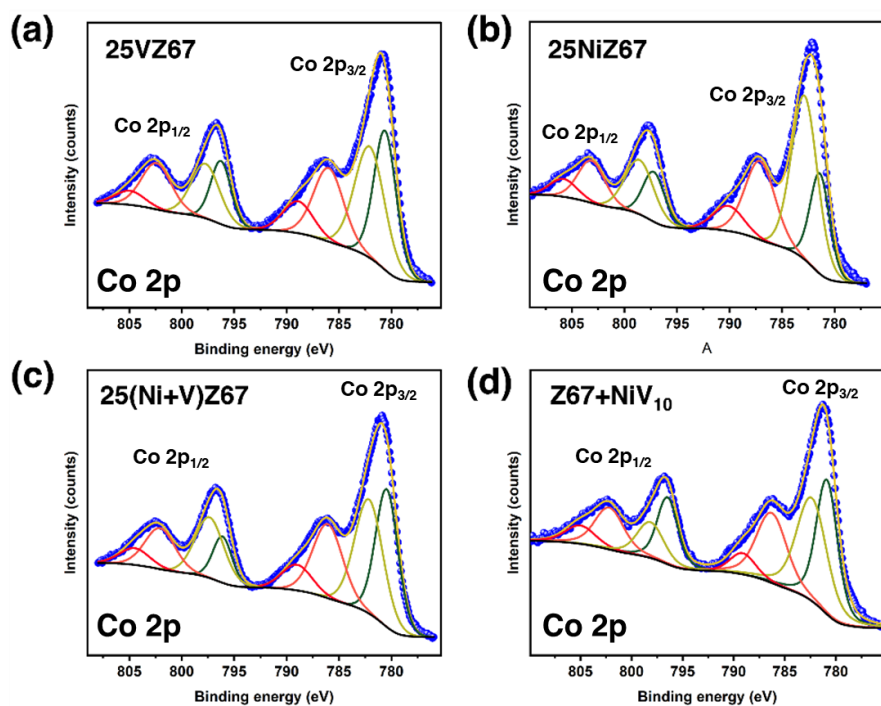

**Fig. S32** Co 2p XPS spectra of (a) 25VZ67; (b) 25NiZ67; (c) 25(Ni+V)Z67 and (d) Z67+NiV<sub>10</sub>.

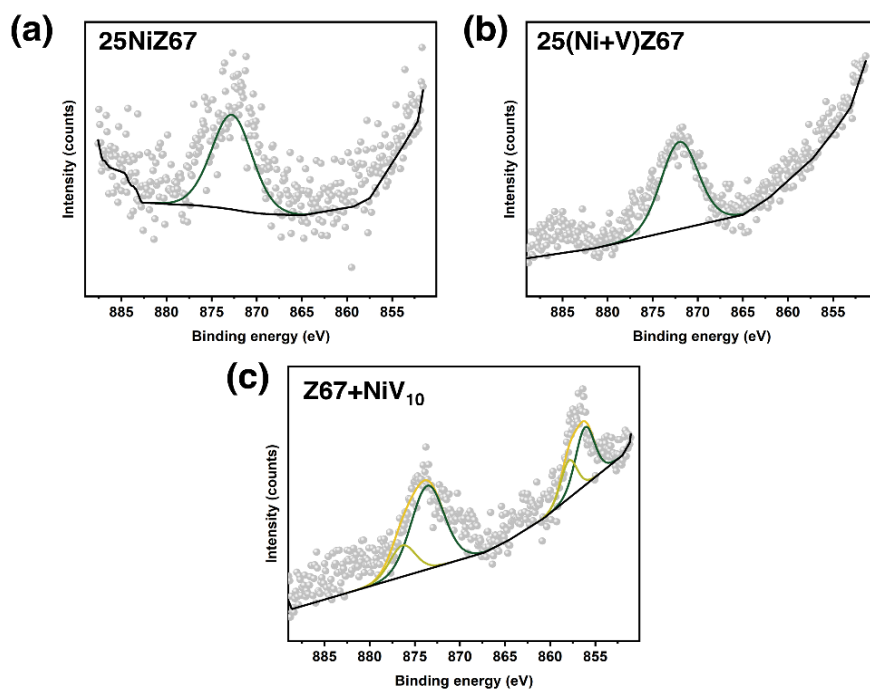

**Fig. S33** Ni 2p XPS spectra of (a) 25NiZ67; (b) 25(Ni+V)Z67 and (c) Z67+NiV<sub>10</sub>.

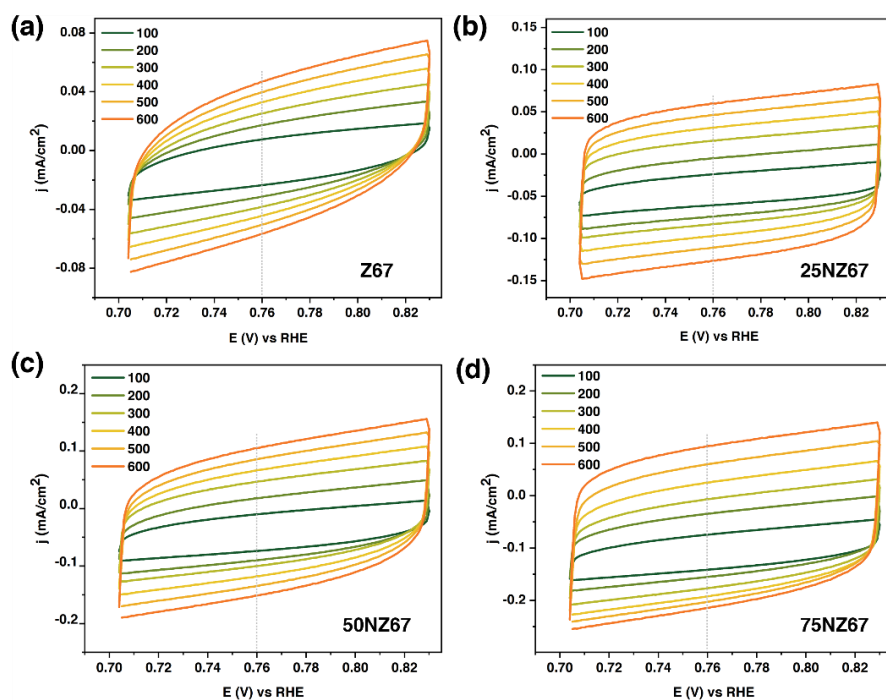

**Fig. S34**  $C_{dl}$  calculation in the non-faradic region of (a) 25NZ67; (b) 50NZ67; (c) 75NZ67 and (d) Z67 at variable scan rates of 100-600 mV/s.

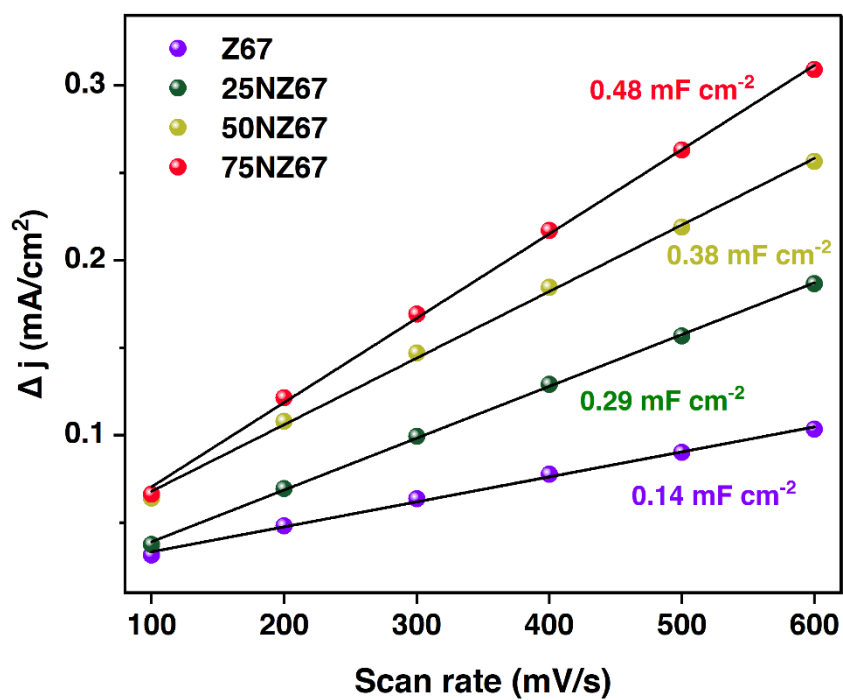

**Fig. S35**  $C_{dl}$  calculation of Z67 and 25/50/75NZ67.

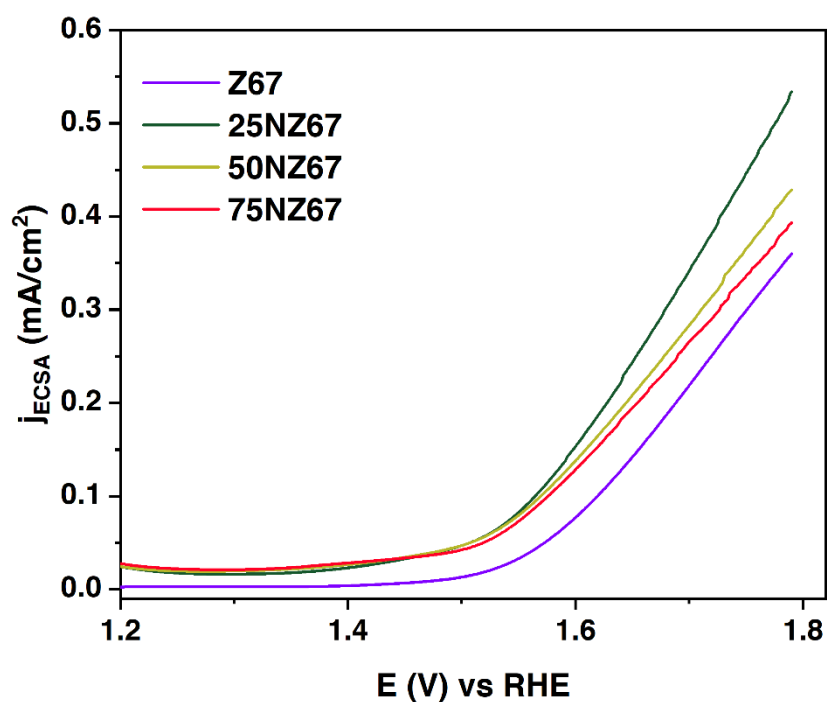

**Fig. S36** ECSA normalized current density vs. potential curves for **Z67** and **25/50/75NZ67**, showing the intrinsic activity of the materials.

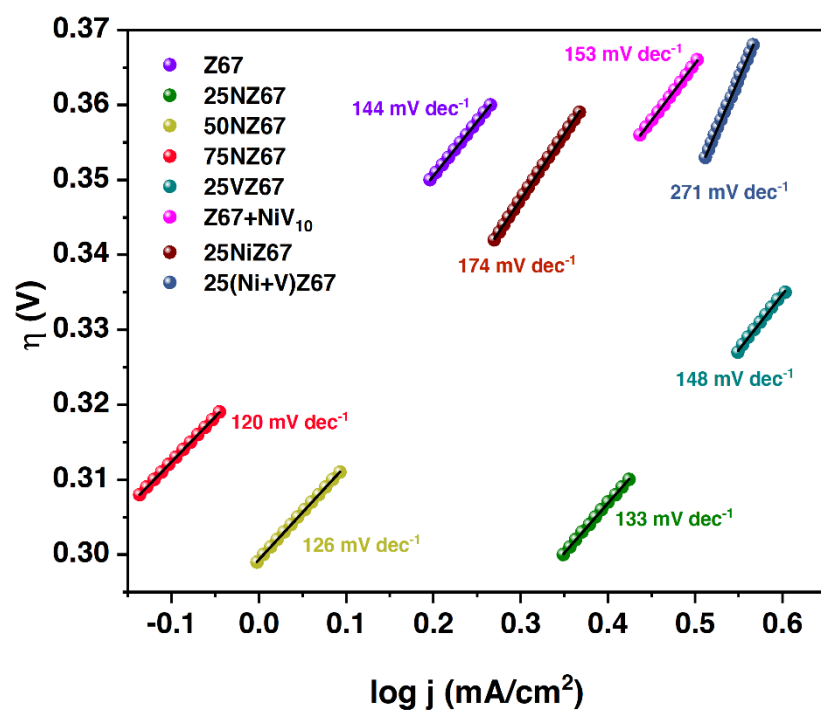

**Fig. S37** Tafel slopes of **Z67**, **25/50/75NZ67** and the control samples (**25VZ67**, **Z67+NiV<sub>10</sub>**, **25NiZ67**, and **25(Ni+V)Z67**).

**Table S4.** EIS circuit fitting parameters for **Z67**, **25NZ67**, **50NZ67** and **75NZ67**.

| <b>Composites</b> | <b><math>R_s</math></b> | <b><math>R_{ct}</math></b> | <b><math>C_{dl}</math></b> |
|-------------------|-------------------------|----------------------------|----------------------------|
| ZIF67             | 86.43 $\Omega$          | 172.60 $\Omega$            | 0.98 mF                    |
| 25NZ67            | 80.75 $\Omega$          | 50.05 $\Omega$             | 3.86 mF                    |
| 50NZ67            | 78.65 $\Omega$          | 47.61 $\Omega$             | 4.66 mF                    |
| 75NZ67            | 77.27 $\Omega$          | 44.06 $\Omega$             | 5.27 mF                    |

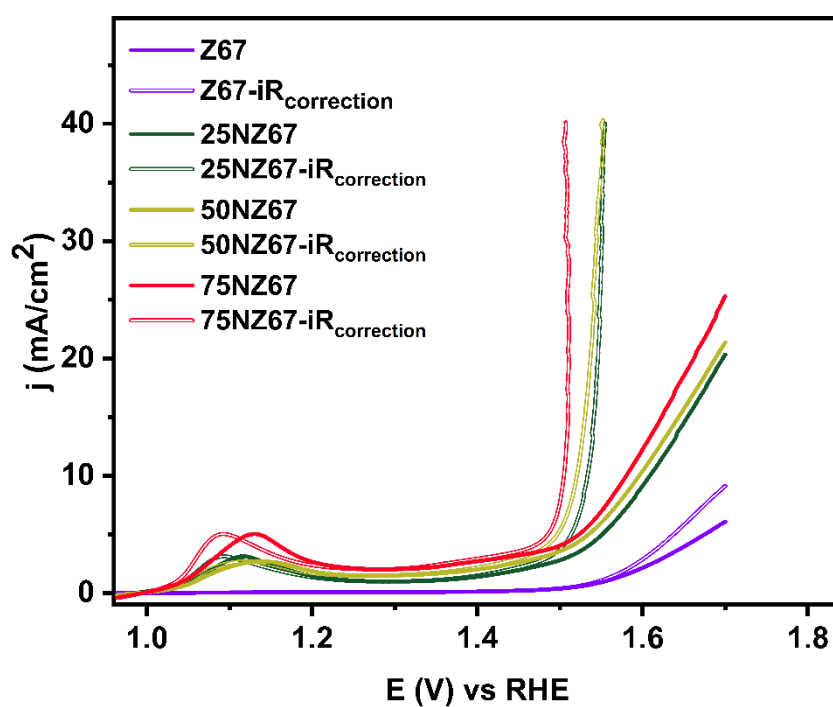

**Fig. S38** LSV scans of **Z67** and **25-75NZ67** composites, along with their iR-corrected LSV curves.



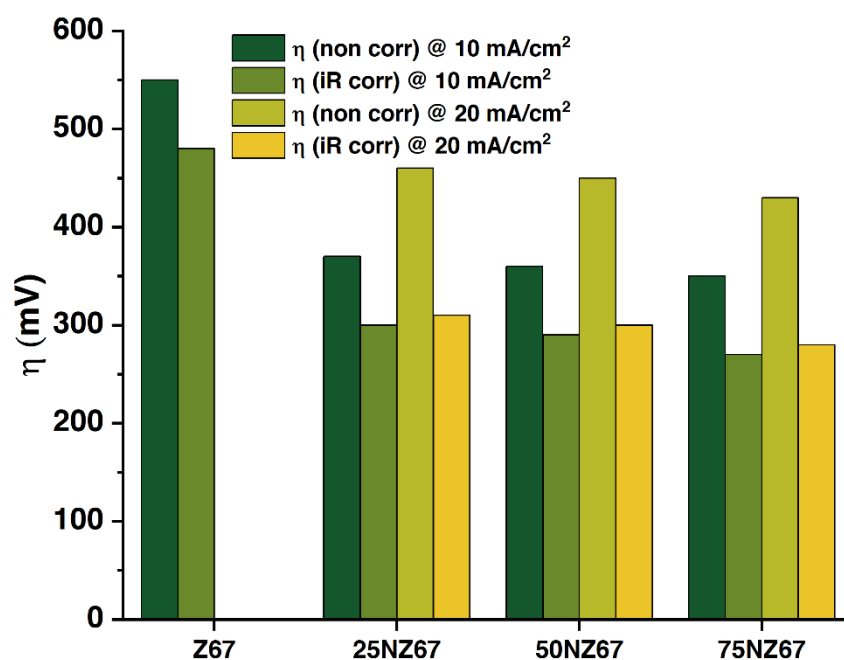

**Fig. S39** Comparison of the iR-corrected and non-corrected overpotential values of the electrocatalysts at  $j = 10 \text{ mA/cm}^2$  and  $20 \text{ mA/cm}^2$ .

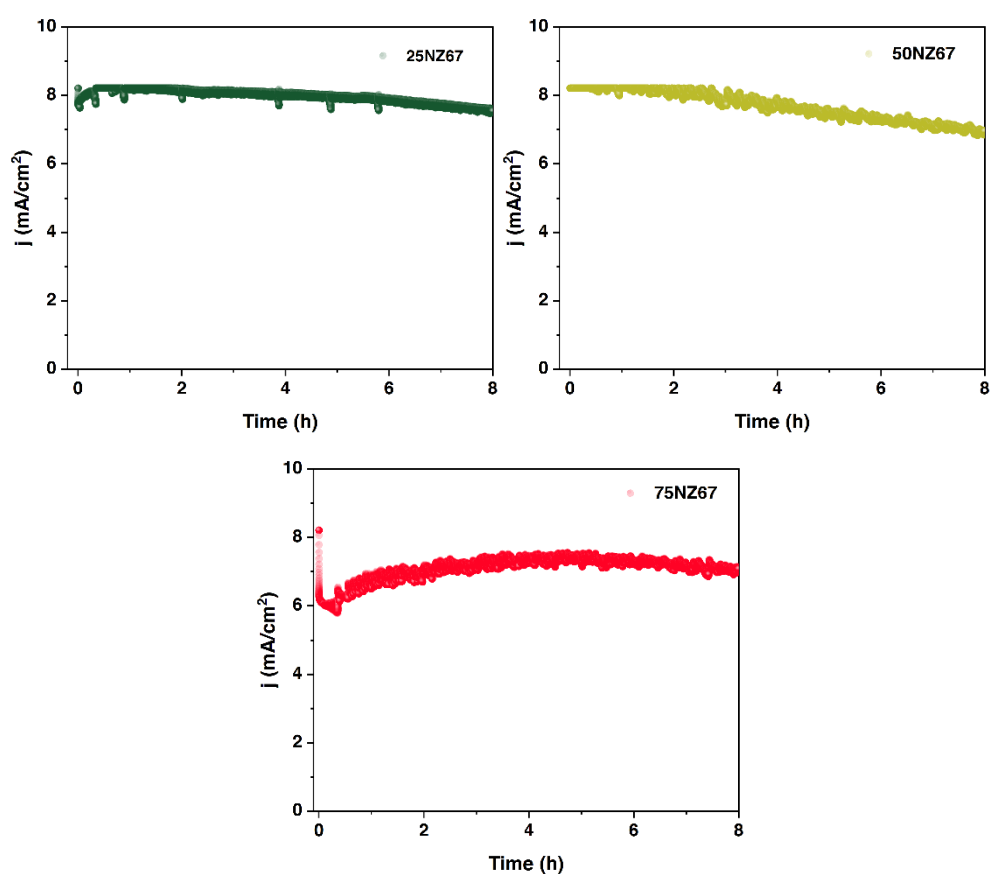

**Fig. S40** 8 h chronoamperometry of 25/50/75NZ67.

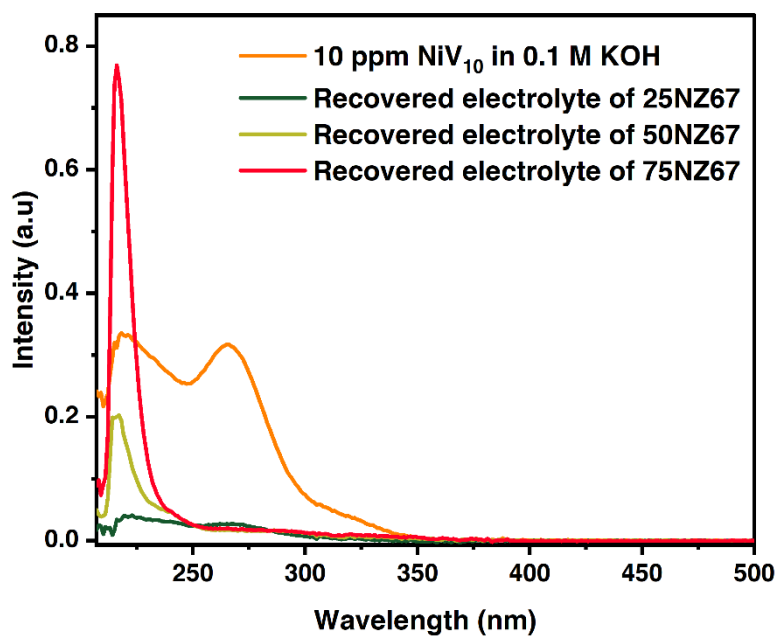

**Fig. S41** UV-Vis spectra of the recovered electrolyte after 8 hours of chronoamperometry for the composites, and a 10-ppm concentration of  $\text{NiV}_{10}$  in 0.1 M KOH. The 0.1 M KOH was used to create the baseline during the UV-Vis spectra experiment.

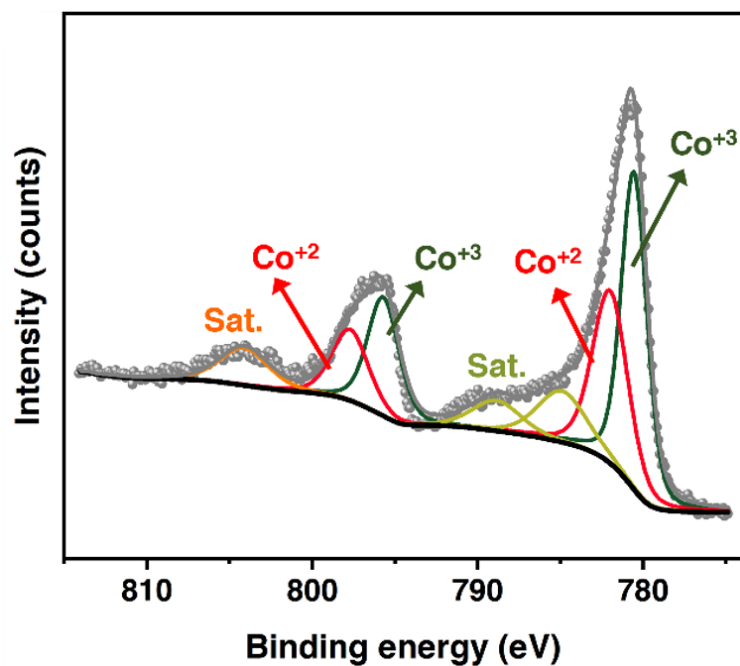

Fig. S42 Deconvoluted Co 2p scan of recovered 25NZ67 after 8 h chronoamperometry.

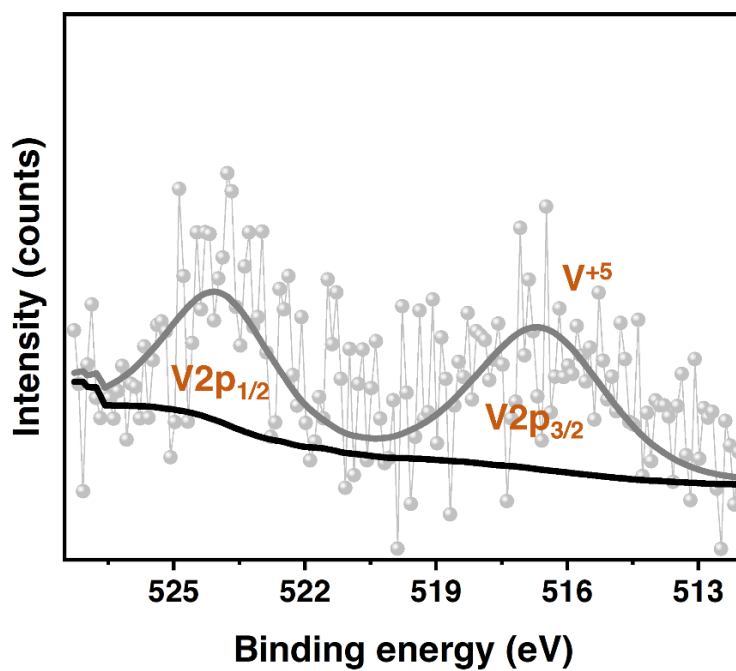

Fig. S43 Deconvoluted V 2p scan of 25NZ67 composite after 8 hr chronoamperometry.

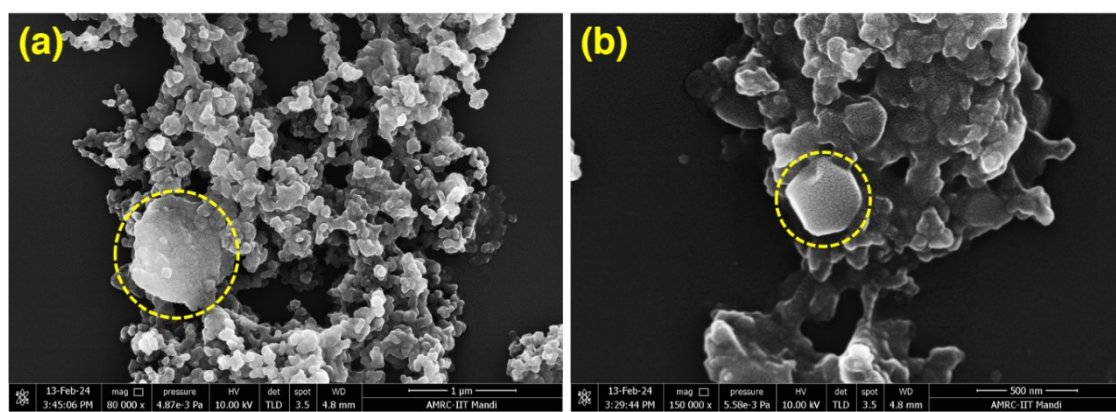

**Fig. S44** FESEM images of recovered **25NZ67**, yellow dashed regions showing **Z67** polyhedra.

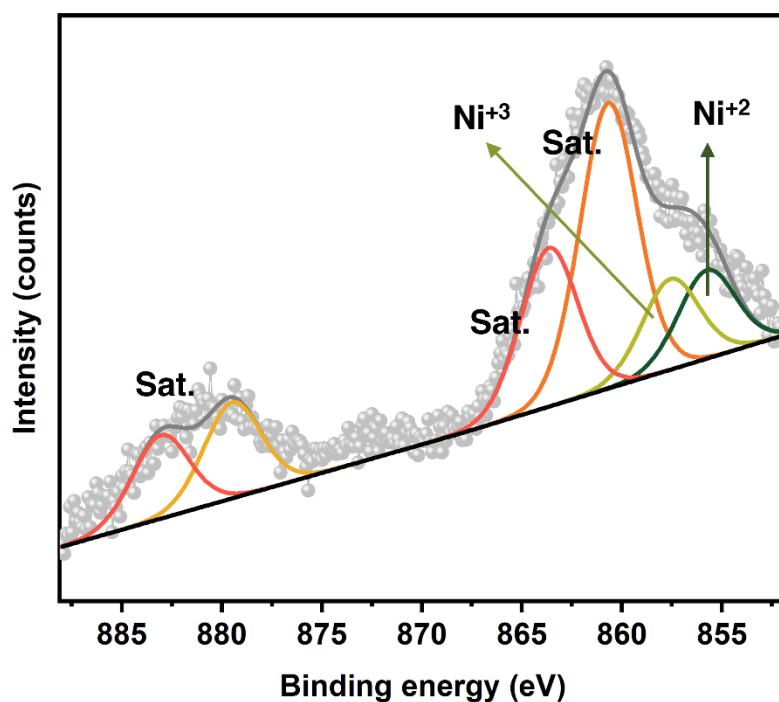

**Fig. S45** Deconvoluted Ni 2p scan of **25NZ67** composite after 8 hr chronoamperometry.

**Table S5.** Comparison of similar ZIF based catalysts for electrocatalytic OER.

| Sr. No. | Material                                       | Electrolyte | $\eta$ @ 10<br>(mA/cm <sup>2</sup> ) | Tafel slope<br>(mV dec <sup>-1</sup> ) | Ref.             |
|---------|------------------------------------------------|-------------|--------------------------------------|----------------------------------------|------------------|
| 1.      | <b>ZIF-67@POM</b>                              | 1.0 M KOH   | 287                                  | 58                                     | 2                |
| 2.      | <b>Ti@TiO<sub>2</sub>/CdS/ZIF-67</b>           | 0.5 M KOH   | 287                                  | 42                                     | 3                |
| 3.      | <b>CoNiP/NC700</b>                             | 1.0 M KOH   | 300                                  | 66                                     | 4                |
| 4.      | <b>Co-ZIF-9</b>                                | 0.1 M KOH   | 510                                  | 93                                     | 5                |
| 5.      | <b>ZIF-67/NPC-2 (2:1)</b>                      | 0.1 M KOH   | 410                                  | 114                                    | 6                |
| 6.      | <b>ZIF-8@ZIF-67@POM</b>                        | 1.0 M KOH   | 490                                  | 88                                     | 7                |
| 7.      | <b>SiW<sub>9</sub>Co<sub>3</sub>[h]@ZIF-67</b> | 0.1 M KOH   | 420                                  | 94                                     | 8                |
| 8.      | <b>SiW<sub>9</sub>Co<sub>3</sub>@ZIF-67</b>    | 0.1 M KOH   | 470                                  | 114                                    | 9                |
| 9.      | <b>25NZ67</b>                                  | 0.1 M KOH   | 370                                  | 133                                    | <i>This work</i> |
| 10.     | <b>50NZ67</b>                                  | 0.1 M KOH   | 360                                  | 126                                    | <i>This work</i> |
| 11.     | <b>75NZ67</b>                                  | 0.1 M KOH   | 350                                  | 120                                    | <i>This work</i> |

## References

1. X. Li, S. You, J. Du, Y. Dai, H. Chen, Z. Cai, N. Ren and J. Zou, *Journal of Materials Chemistry A*, 2019, **7**, 25853-25864.
  2. Q. Y. Li, L. Zhang, Y. X. Xu, Q. Li, H. Xue and H. Pang, *ACS Sustainable Chemistry & Engineering*, 2019, **7**, 5027-5033.
  3. T. Zhang, J. Du, H. Zhang and C. Xu, *Electrochimica Acta*, 2016, **219**, 623-629.
  4. J. Li, G. Du, X. Cheng, P. Feng and X. Luo, *Chinese Journal of Catalysis*, 2018, **39**, 982-987.
  5. S. Wang, Y. Hou, S. Lin and X. Wang, *Nanoscale*, 2014, **6**, 9930-9934.
  6. H. Wang, F.-X. Yin, B.-H. Chen, X.-B. He, P.-L. Lv, C.-Y. Ye and D.-J. Liu, *Applied Catalysis B: Environmental*, 2017, **205**, 55-67.
  7. Y. Wang, Y. Wang, L. Zhang, C.-S. Liu and H. Pang, *Inorganic Chemistry Frontiers*, 2019, **6**, 2514-2520.
  8. V. K. Abdelkader-Fernández, D. M. Fernandes, S. S. Balula, L. Cunha-Silva and C. Freire, *Journal of Materials Chemistry A*, 2020, **8**, 13509-13521.
  9. V. K. Abdelkader-Fernández, D. M. Fernandes, S. S. Balula, L. Cunha-Silva and C. Freire, *ACS Applied Energy Materials*, 2020, **3**, 2925-2934.
-
